# Supplementary material
Source: PubMed Central journal article supplement (PMC9179099)
Supplement: mmc1.pdf [file mmc1.pdf]

**Supplementary file 1 Distribution of participants who responded to the open-ended respectful care question by country**

| <b>No.</b> | <b>Country</b>                    | <b>Number</b> | <b>Percentage</b> |
|------------|-----------------------------------|---------------|-------------------|
| 1          | Argentina                         | 2             | 1.7               |
| 2          | Belgium                           | 2             | 1.7               |
| 3          | Benin                             | 1             | 0.8               |
| 4          | Bolivia                           | 1             | 0.8               |
| 5          | Brazil                            | 2             | 1.7               |
| 6          | Cameroon                          | 4             | 3.3               |
| 7          | Canada                            | 3             | 2.5               |
| 8          | Congo, Democratic Republic of the | 8             | 6.7               |
| 9          | France                            | 4             | 3.3               |
| 10         | Germany                           | 11            | 9.2               |
| 11         | India                             | 6             | 5.0               |
| 12         | Italy                             | 6             | 5.0               |
| 13         | Japan                             | 9             | 7.5               |
| 14         | Kazakhstan                        | 12            | 10.0              |
| 15         | Malawi                            | 1             | 0.8               |
| 16         | Morocco                           | 2             | 1.7               |
| 17         | Mozambique                        | 1             | 0.8               |
| 18         | Nigeria                           | 8             | 6.7               |
| 19         | Norway                            | 6             | 5.0               |
| 20         | Panama                            | 1             | 0.8               |
| 21         | Peru                              | 1             | 0.8               |
| 22         | Rwanda                            | 2             | 1.7               |
| 23         | Saudi Arabia                      | 1             | 0.8               |
| 24         | Spain                             | 5             | 4.2               |
| 25         | Sweden                            | 1             | 0.8               |
| 26         | Switzerland                       | 2             | 1.7               |
| 27         | Tanzania                          | 3             | 2.5               |
| 28         | Uganda                            | 2             | 1.7               |
| 29         | United Kingdom                    | 2             | 1.7               |
| 30         | United States                     | 5             | 4.2               |
| 31         | Uruguay                           | 4             | 3.3               |
| 32         | Uzbekistan                        | 1             | 0.8               |
| 33         | Zambia                            | 1             | 0.8               |
|            | <b>Total</b>                      | <b>120</b>    | <b>100</b>        |
